# Supplementary material
Source: Copernicus journal article supplement (doi:10.5194/acp-26-8553-2026)
Supplement: Supplementary file 1 [file acp-26-8553-2026-supplement.pdf]

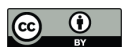

*Supplement of*

## **Decomposing pre-industrial to present-day land use change forcing in the UK Earth System Model**

**Emma Sands et al.**

*Correspondence to:* Emma Sands (e.g.sands@ed.ac.uk)

The copyright of individual parts of the supplement might differ from the article licence.

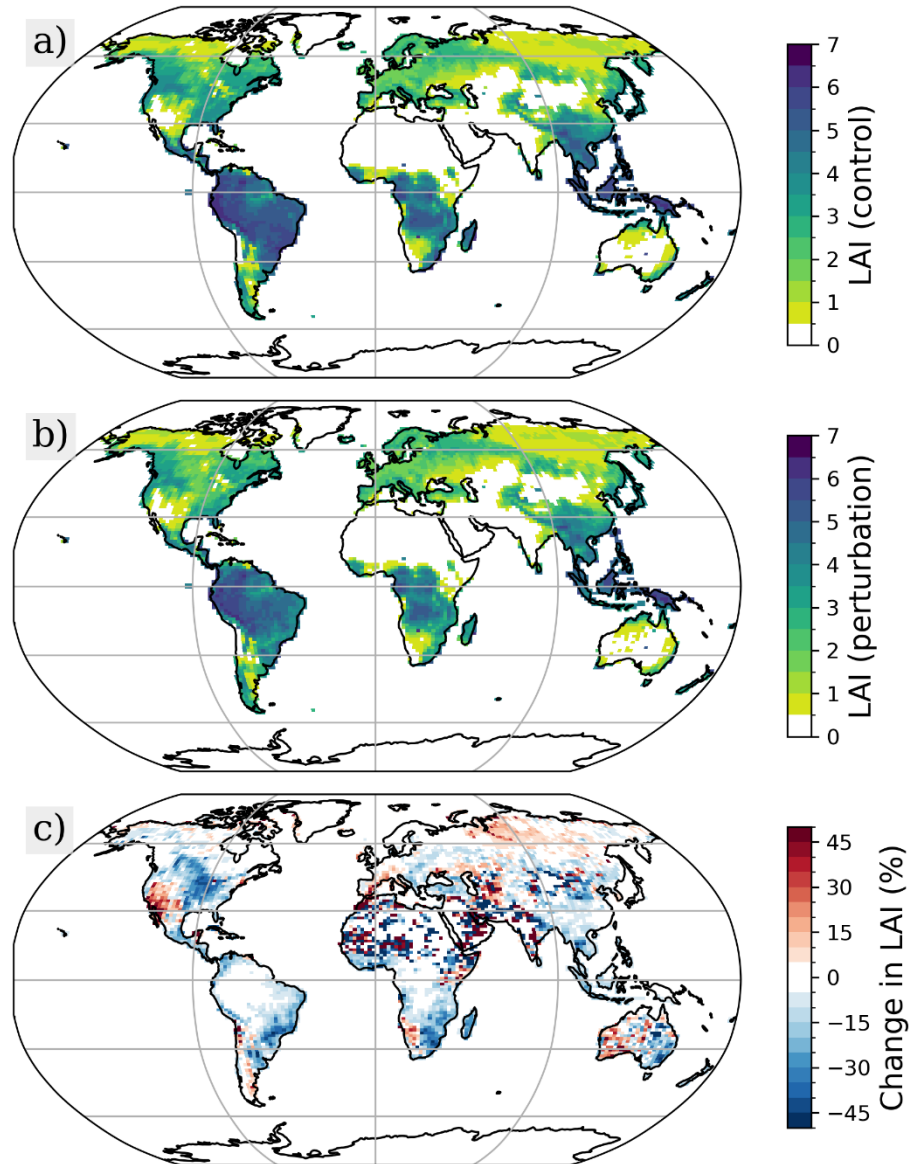

Figure S1. Leaf Area Index (LAI) for 1850 control (a) and present-day perturbation (b). Panel (c) shows the change from pre-industrial to present-day conditions (2014 – 1850) as a % of the 1850 LAI.

Table S1. Sulfate aerosol formation fluxes under pre-industrial conditions and response to the land cover perturbation.

| Secondary SU production                    | Standard chemistry                       |                                       | Complex chemistry                        |                                       |
|--------------------------------------------|------------------------------------------|---------------------------------------|------------------------------------------|---------------------------------------|
|                                            | Pre-industrial (Tg(S) yr <sup>-1</sup> ) | Change in land cover perturbation (%) | Pre-industrial (Tg(S) yr <sup>-1</sup> ) | Change in land cover perturbation (%) |
| Nucleation via OH                          | 0.03 ± 0.00                              | +3                                    | 0.02 ± 0.00                              | +6                                    |
| Condensation via OH                        | 7.09 ± 0.01                              | +4                                    | 6.92 ± 0.01                              | +2                                    |
| In-cloud via H <sub>2</sub> O <sub>2</sub> | 5.31 ± 0.01                              | -3                                    | 3.65 ± 0.01                              | -3                                    |
| In-cloud via O <sub>3</sub>                | 1.13 ± 0.00                              | 0                                     | 0.58 ± 0.00                              | +2                                    |

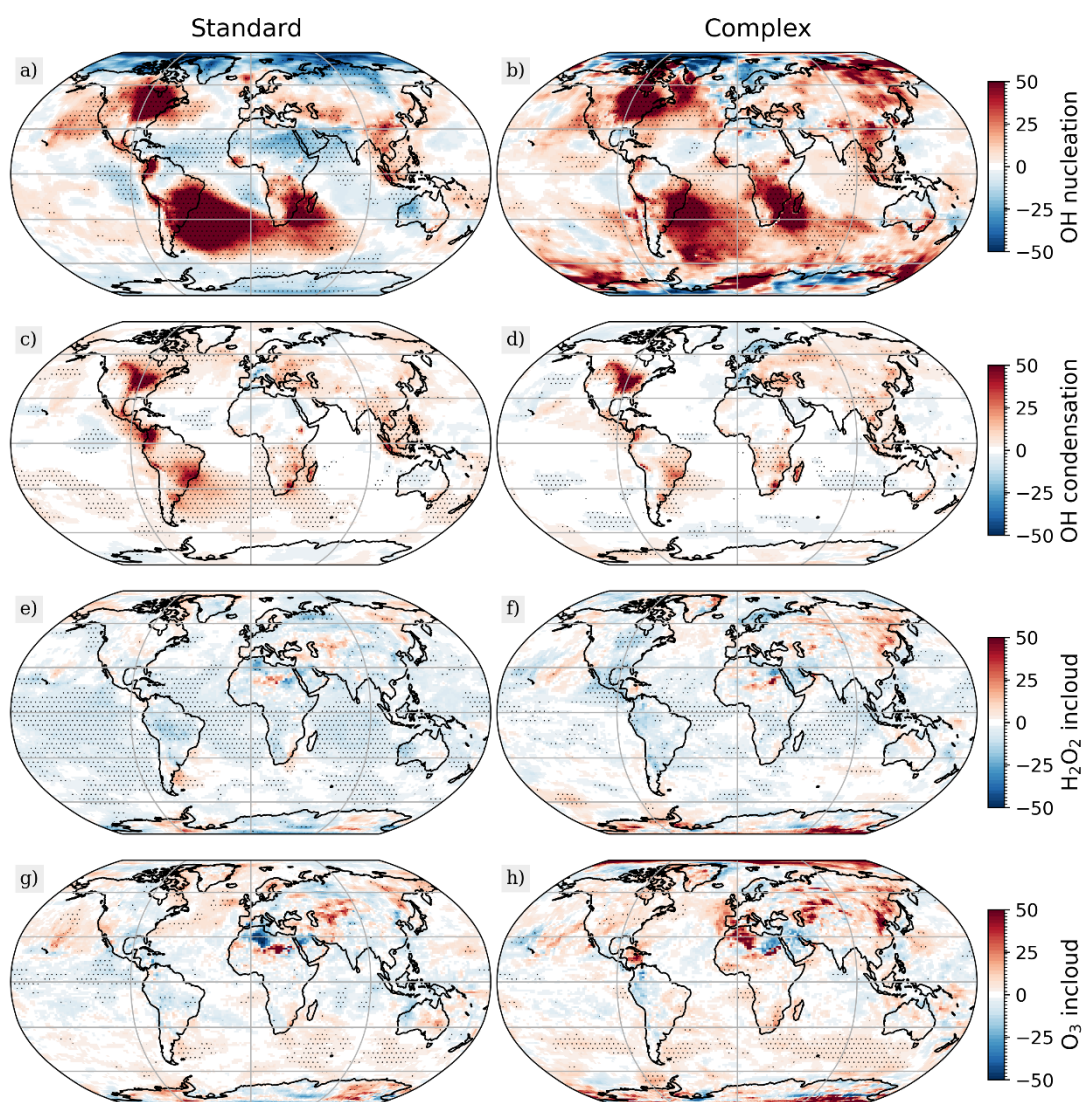

Figure S2. Changes (%) in sulfate aerosol formation fluxes for the standards (left column) and complex (right column) chemistry mechanisms in response to pre-industrial to present-day land cover change. The aerosol formation is divided in to nucleation with OH (a, b), condensation with OH (c, d), in-cloud reactions with H<sub>2</sub>O<sub>2</sub> (e, f), and in-cloud reactions with O<sub>3</sub> (g, h).

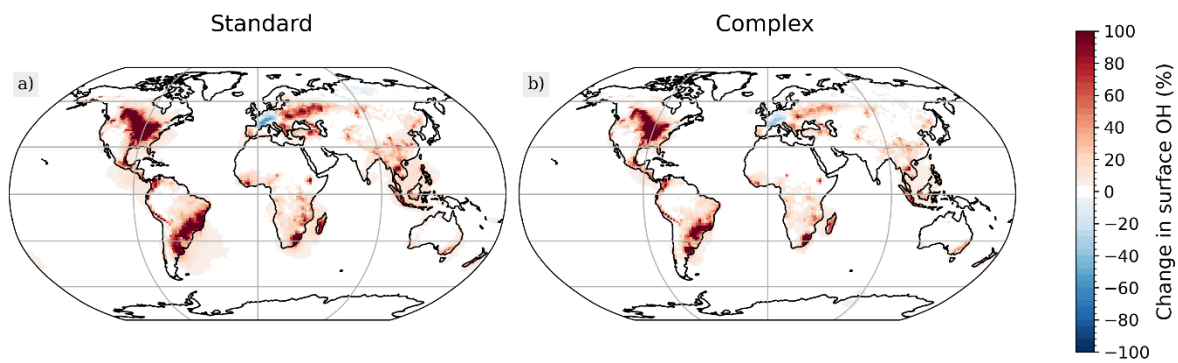

Figure S3. Change in surface OH in response to pre-industrial to present-day land use change for the standard (a) and complex (b) chemistry mechanisms.

Table S2. Regional mean radiative forcing values from pre-industrial to present-day land use change.

| Region             | Forest cover (%) | Grass cover (%) | Isoprene emissions (%) |      | Monoterpene emissions |     | ERFLU (W m <sup>-2</sup> ) |            | IRF <sub>ARI</sub> |           | ΔCRE       |            | IRF <sub>O3</sub> |            | RF <sub>alb</sub> |
|--------------------|------------------|-----------------|------------------------|------|-----------------------|-----|----------------------------|------------|--------------------|-----------|------------|------------|-------------------|------------|-------------------|
|                    |                  |                 |                        |      |                       |     |                            |            |                    |           |            |            |                   |            |                   |
| Non-Arctic Ocean   | 0                | +4              | -1                     | 0    | 0                     | 0   | 0.02±0.06                  | 0.05±0.05  | 0.04±0.02          | 0.04±0.01 | 0.02±0.04  | 0.04±0.04  | -0.01±0.01        | -0.02±0.01 | 0.01±0.01         |
| USA and Canada     | -17              | +33             | -16                    | -18  | -18                   | -18 | -1.20±0.11                 | -0.92±0.11 | 0.13±0.02          | 0.12±0.01 | 0.50±0.17  | 0.91±0.18  | 0.05±0.03         | 0.03±0.03  | -2.19±0.14        |
| Europe             | +15478           | +8              | +172                   | +166 | +133                  | 123 | -0.44±0.19                 | -1.03±0.22 | 0.08±0.03          | 0.09±0.03 | 0.11±0.24  | -0.86±0.30 | 0.04±0.03         | 0.01±0.04  | -0.65±0.19        |
| South Asia         | -8               | +1723           | -17                    | -16  | -2                    | -2  | 0.08±0.30                  | -0.10±0.20 | -0.01±0.06         | 0.07±0.06 | 0.26±0.11  | -0.11±0.12 | 0.01±0.02         | -0.02±0.02 | -0.29±0.17        |
| East Asia          | -6               | +22             | -15                    | -14  | -7                    | -9  | 0.00±0.15                  | -0.21±0.15 | 0.03±0.04          | 0.07±0.03 | 0.78±0.19  | 0.24±0.22  | 0.02±0.03         | 0.01±0.03  | -0.37±0.08        |
| Southeast Asia     | -17              | +74             | -20                    | -19  | -17                   | -18 | -0.33±0.17                 | -0.43±0.14 | 0.16±0.02          | 0.21±0.02 | 0.66±0.12  | 0.33±0.18  | -0.01±0.02        | -0.01±0.01 | -0.96±0.03        |
| Australia/Oceania  | -7               | +10             | -6                     | -10  | -3                    | -3  | -0.01±0.18                 | 0.11±0.16  | 0.04±0.04          | 0.04±0.03 | -0.09±0.34 | -0.01±0.32 | -0.01±0.03        | -0.02±0.02 | -0.04±0.14        |
| Northern Africa    | -1               | +1373           | -1                     | -2   | 0                     | 0   | -0.07±0.25                 | -0.24±0.21 | 0.08±0.03          | 0.12±0.04 | 0.03±0.11  | 0.00±0.10  | -0.01±0.02        | -0.02±0.02 | -0.03±0.09        |
| Sub Sahel Africa   | -16              | +83             | -22                    | -22  | -13                   | -13 | -0.09±0.13                 | -0.10±0.12 | 0.25±0.07          | 0.22±0.05 | 0.23±0.10  | 0.36±0.10  | -0.01±0.01        | -0.02±0.01 | -0.27±0.05        |
| Middle East        | -3               | +560            | +3                     | +4   | -1                    | -1  | 0.05±0.31                  | -0.37±0.24 | 0.09±0.03          | 0.04±0.03 | 0.23±0.13  | -0.20±0.12 | 0.00±0.03         | -0.03±0.03 | 0.11±0.12         |
| Central America    | -16              | +206            | -14                    | -15  | -13                   | -13 | -0.50±0.16                 | -0.70±0.16 | 0.07±0.02          | 0.10±0.02 | 0.33±0.12  | 0.33±0.12  | -0.01±0.01        | -0.01±0.01 | -0.87±0.03        |
| South America      | -12              | +93             | -16                    | -16  | -13                   | -14 | -0.57±0.10                 | -0.52±0.11 | 0.15±0.01          | 0.19±0.02 | 0.72±0.13  | 0.60±0.12  | 0.00±0.01         | -0.02±0.01 | -1.05±0.03        |
| Ukraine and Russia | -15              | +12             | -13                    | -16  | -12                   | -14 | -0.55±0.16                 | -1.11±0.20 | 0.12±0.02          | 0.11±0.02 | 0.31±0.18  | -0.16±0.20 | 0.02±0.03         | 0.00±0.03  | -0.99±0.21        |
| Central Asia       | +26              | +6              | +1                     | +1   | -1                    | -1  | -0.06±0.21                 | -0.09±0.21 | 0.12±0.06          | 0.03±0.06 | 0.04±0.27  | 0.16±0.19  | 0.03±0.03         | -0.01±0.04 | -0.80±0.33        |
| Arctic             | 0                | +21             | 0                      | 0    | 1                     | 0   | -0.17±0.15                 | -0.11±0.15 | 0.02±0.01          | 0.03±0.02 | -0.18±0.10 | 0.11±0.11  | 0.01±0.04         | 0.00±0.04  | 0.03±0.07         |
| Antarctic          | 0                | 0               | 0                      | 0    | 0                     | 0   | 0.03±0.13                  | -0.38±0.15 | 0.01±0.00          | 0.01±0.00 | -0.07±0.04 | -0.06±0.07 | 0.00±0.02         | -0.06±0.02 | 0.01±0.01         |

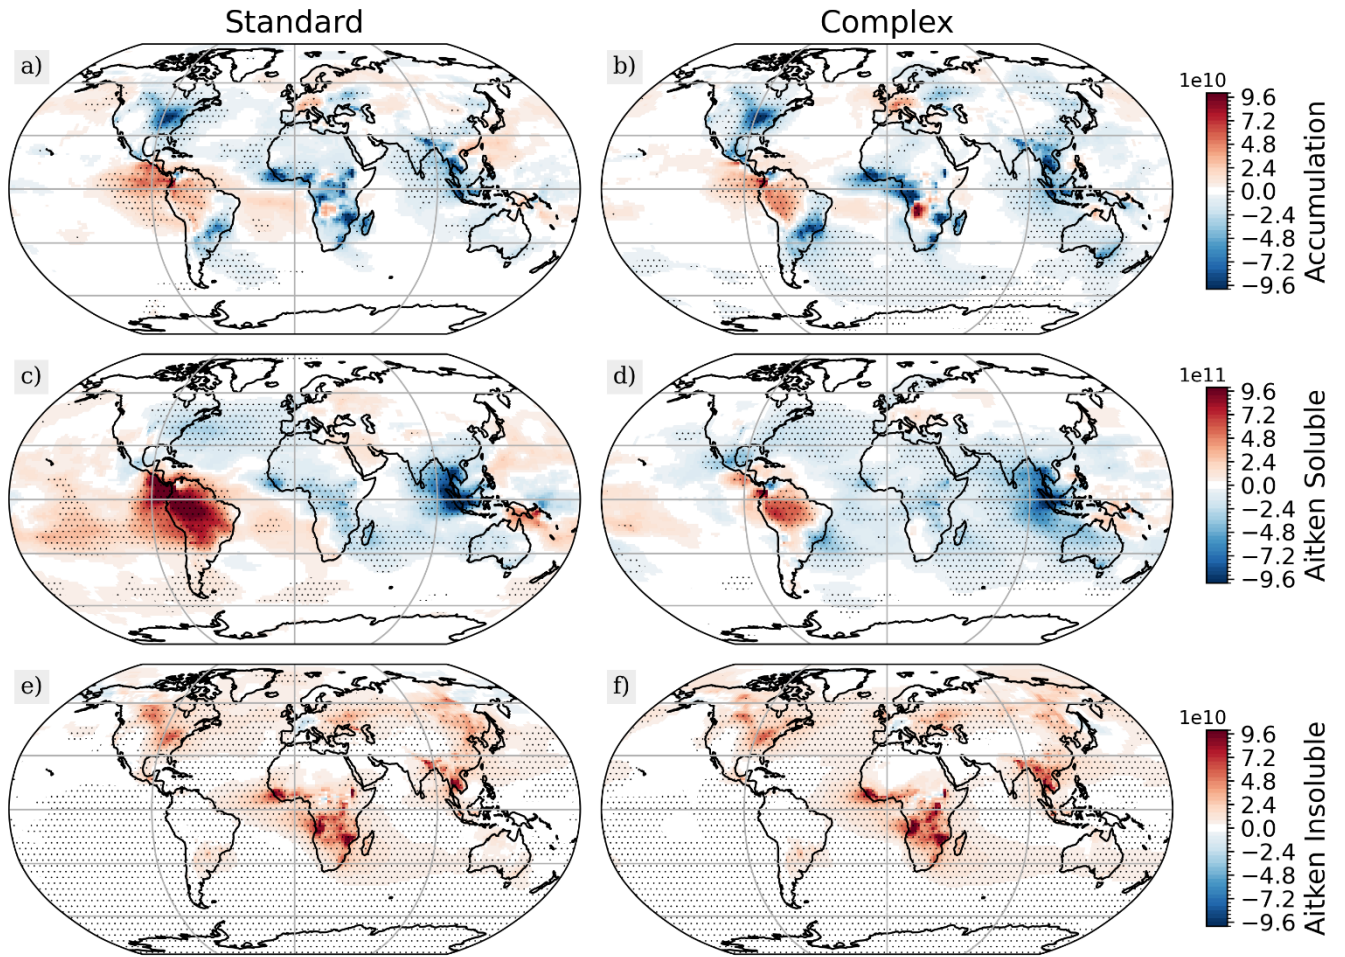

Figure S4. Change in accumulation mode (a,b), Aitken soluble mode (c,d) and Aitken insoluble mode (e,f) aerosol numbers (number  $m^{-2}$ ) in response to pre-industrial to present-day land use change for the standard (left column) and complex (right column) chemistry mechanisms.

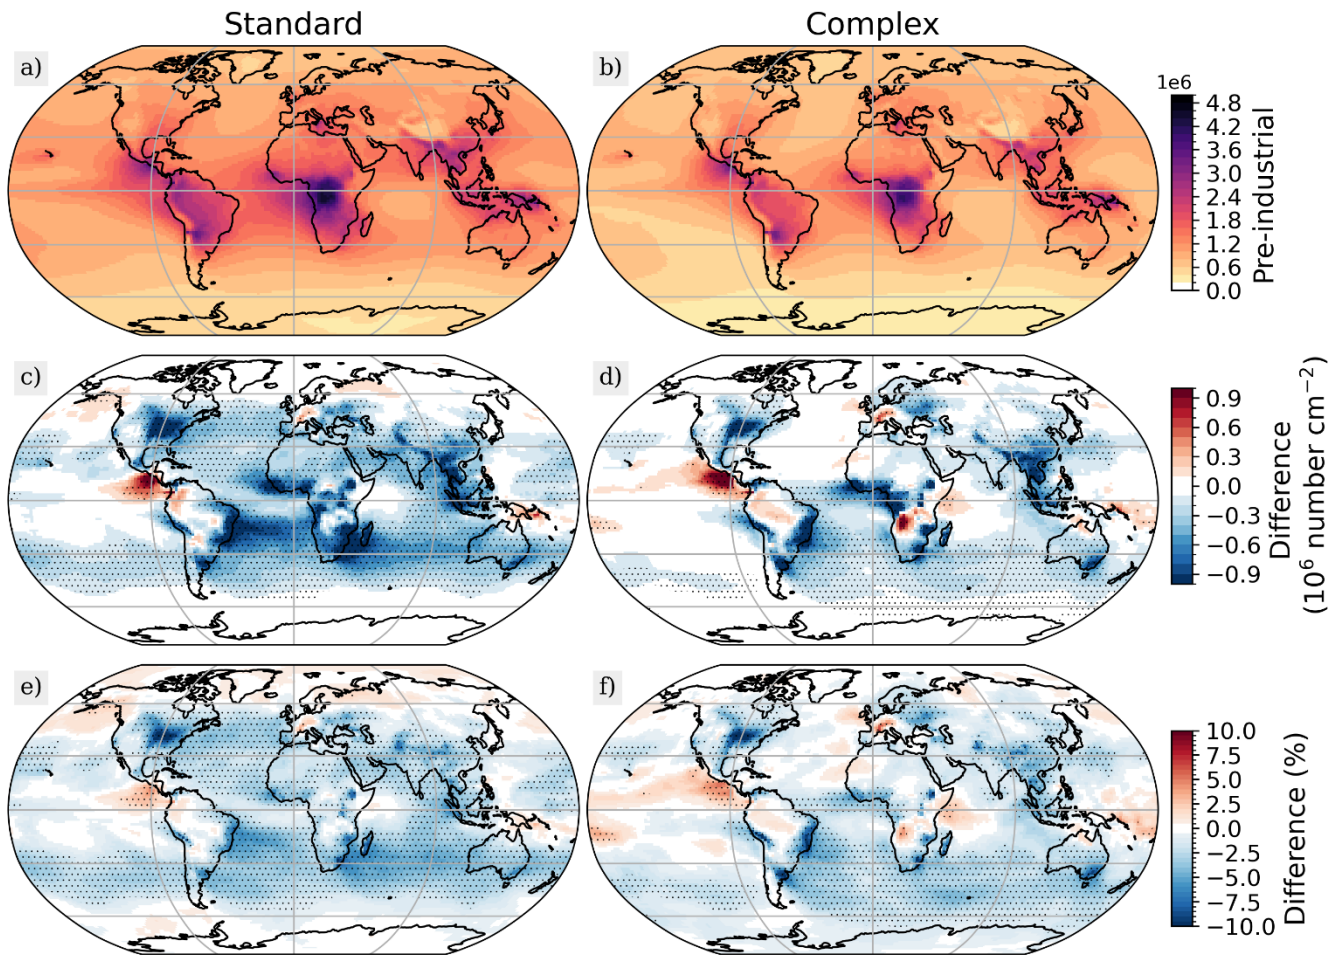

Figure S5. Cloud condensation nuclei (CCN) in the pre-industrial (a,b) and the change in CCN in response to pre-industrial to present-day land use change (c-f) for the standard (left column) and complex (right column) chemistry mechanisms.

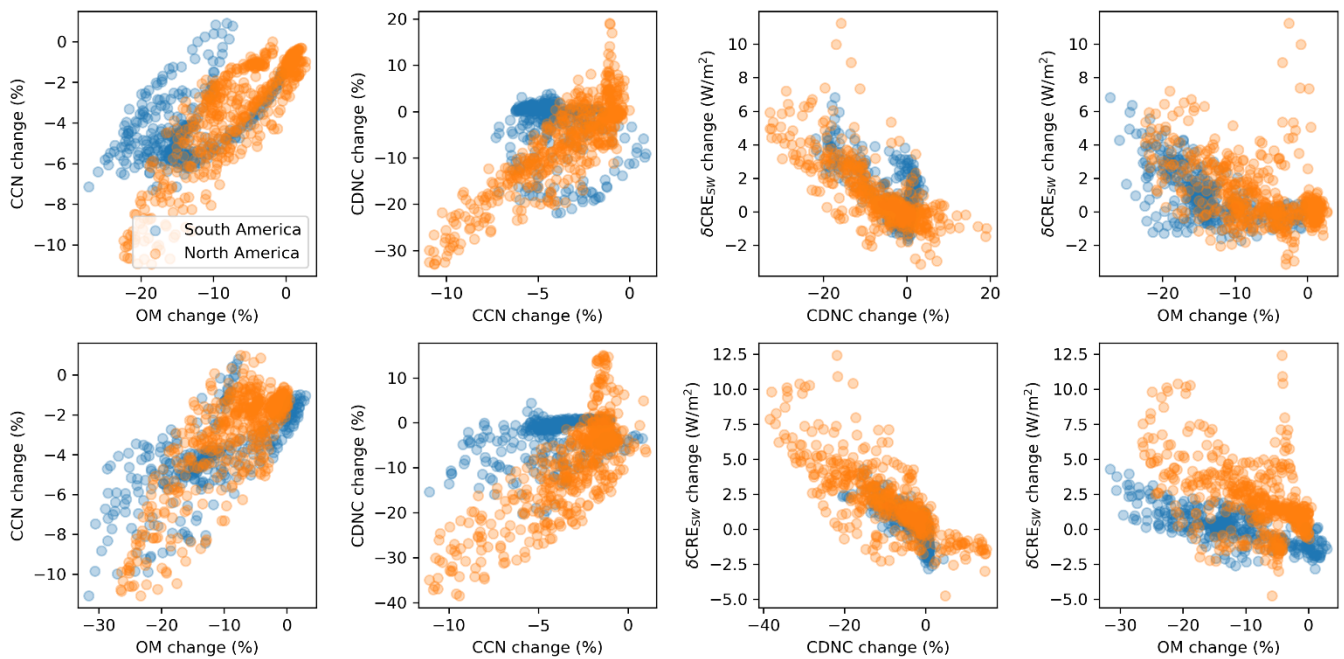

Figure S6. Connection between organic matter aerosol burden and change in shortwave cloud radiative effect through impacts on CCN and cloud droplet number concentration (CDNC). The top for shows results for the standard chemistry mechanism, while the bottom row refers to the complex chemistry mechanism.
